# Supplementary material for: Intrahepatic microbes govern liver immunity by programming NKT cells
Source: PubMed Central journal article supplement (PMC9012289; doi:10.1172/jci151725), 2022-04-15
Supplement: jci-132-151725-s159.pdf [file jci-132-151725-s159.pdf]

## 1 **Supplemental Methods**

### 2 *Murine Cellular Isolation, Flow Cytometry, and In Vitro Experiments*

3 Murine hepatic non-parenchymal cells (NPC) were collected as previously described (1).  
4 Briefly, the portal vein was cannulated and infused with 1% Collagenase IV  
5 (Worthington Biochemical, Lakewood, NJ). The liver was then removed, minced,  
6 incubated with Collagenase IV at 37° for 10 minutes, and passed through a 70 µm mesh  
7 to obtain a single-cell suspension. Liver non-parenchymal cells were enriched over a 40%  
8 Optiprep (Sigma) gradient. Cells were resuspended in ice-cold PBS with 1% FBS. After  
9 blocking FcγRIII/II with an anti-CD16/CD32 mAb (eBioscience), cell labeling was  
10 performed by incubating 10<sup>6</sup> cells with 1 µg of fluorescently conjugated antibody  
11 directed against murine CD45 (30-F11), CD45.1 (A20), CD45.2 (104), CD11b (M1/70),  
12 F4/80 (BM8), Gr-1 (RB6-8C5), CD11c (N418), MHC II (M5/114.15.2), CD80 (16-  
13 10A1), CD86 (GL-1), CD3 (17A2), TCRβ (H57-597), NK1.1 (PK136), CD48 (HM48-1),  
14 CD1d (1B1), CD244 (m2B4[B6]458.1), CCL5 (2E9/CCL5), IL10 (JES5-16E3), IFNγ  
15 (XMG1.2), CD4 (RM4-5), CD8a (53-6.7), Vβ2 (B20.6), Vβ7 (TR310; all BioLegend),  
16 Vβ8 (REA684; Miltenyi), and FoxP3 (FJK-16s; Invitrogen). Cell preparation for  
17 intracellular staining was performed using the Fixation and Permeabilization Solution Kit  
18 (eBiosciences). H-2kb-OVA peptide (SIINFEKL)-dextramer staining was performed  
19 using an MHC I Dextramer (Immudex, Copenhagen, Denmark). Invariant NKT tetramer  
20 staining was performed using the CD1d PBS-57 tetramer (NIH Tetramer Core Facility).  
21 Dead cells were excluded from analysis using Zombie Yellow (BioLegend). Flow  
22 cytometry was performed on the Attune NxT Acoustic Focusing Cytometer (Thermo  
23 Fisher). FACS-sorting was performed on the SY3200 (Sony, Tokyo, Japan). Data were

24 analyzed using FlowJo (Treestar, Ashland, OR). For hepatic NKT cell stimulation assays,  
25 hepatic NPC were cultured with or without  $\alpha$ -GalCer (2 $\mu$ g/mL; BioVision, Milpitas, CA).  
26 *Single Cell RNA Sequencing*  
27 Sequencing results were demultiplexed and converted to FASTQ format using Illumina  
28 bcl2fastq software. The Cell Ranger Single-Cell Software Suite  
29 ([https://support.10xgenomics.com/single-cell-gene-](https://support.10xgenomics.com/single-cell-gene-expression/software/pipelines/latest/what-is-cell-ranger)  
30 [expression/software/pipelines/latest/what-is-cell-ranger](https://support.10xgenomics.com/single-cell-gene-expression/software/pipelines/latest/what-is-cell-ranger)) was used to perform sample  
31 demultiplexing, barcode processing, and single-cell 3' gene counting. The cDNA insert  
32 was aligned to the mm10/GRCm38 reference genome. Only confidently mapped non-  
33 PCR duplicates with valid barcodes and UMIs were used to generate the gene-barcode  
34 matrix. To account for technical batch differences, we utilized the scSeqR alignment  
35 method for data integration. We took the union of the top 2,000 genes with the highest  
36 dispersion from both datasets and ran a canonical correlation analysis (CCA) to  
37 determine the common sources of variation between datasets. We then aligned the  
38 subspaces based on the first 16 canonical correlation vectors, generating a new  
39 dimensionality reduction that was then used for further analysis. The data was visualized  
40 with t-distributed Stochastic Neighbor Embedding (tSNE) based on the aligned CCA.  
41 Marker genes were determined based on differential expression analysis using Wilcoxon  
42 rank sum test for each cluster. Cell type identities based on known population markers  
43 were assigned as follows: Myeloid cells (*Lyz2<sup>hi</sup>Apoe<sup>hi</sup>Lgals3<sup>hi</sup>Bst2<sup>hi</sup>Pld4<sup>hi</sup>Cst3<sup>hi</sup>*), NK1.1<sup>+</sup>  
44 lymphocytes (*Gzma<sup>hi</sup>Gzmb<sup>hi</sup>Ncr1<sup>hi</sup>Fcer1g<sup>hi</sup>Klre1<sup>hi</sup>Klrc2<sup>hi</sup>*), Conventional T cells  
45 (*Cd8b1<sup>hi</sup>Tcf7<sup>hi</sup>Lef1<sup>hi</sup>S1pr1<sup>hi</sup>Ccr7<sup>hi</sup>Trac<sup>hi</sup>Tcrg.C1<sup>lo</sup>Tcrg.C2<sup>lo</sup>*), B cells  
46 (*CD79a<sup>hi</sup>CD79b<sup>hi</sup>Ebf1<sup>hi</sup>Ighm<sup>hi</sup>Igkc<sup>hi</sup>Iglc1<sup>hi</sup>Iglc2<sup>hi</sup>Ly6d<sup>hi</sup>*), Innate-like lymphocytes

47 (*Cxcr6<sup>hi</sup>Rora<sup>hi</sup>Socs2<sup>hi</sup>Podnl1<sup>hi</sup>Bcl2a1d<sup>hi</sup>Tcrg.C1<sup>hi</sup>Tcrg.C2<sup>hi</sup>*). For sub-clustering of the  
48 NK1.1<sup>+</sup> lymphocyte cluster, cell type identities were assigned as follows: NKT cells  
49 (*Cd3d<sup>hi</sup>Cd3e<sup>hi</sup>Cd8a<sup>hi</sup>Trac<sup>hi</sup>Trdc<sup>hi</sup>Thy1<sup>hi</sup>*) EOMES<sup>-</sup> NK cells  
50 (*Eomes<sup>lo</sup>Gzmc<sup>hi</sup>Klrb1b<sup>hi</sup>Lag3<sup>hi</sup>Cd200r1<sup>hi</sup>Cd200r2<sup>hi</sup>*) EOMES<sup>+</sup> NK cells  
51 (*Eomes<sup>hi</sup>Prf1<sup>hi</sup>Klrg1<sup>hi</sup>Klra4<sup>hi</sup>Klra8<sup>hi</sup>Zeb2<sup>hi</sup>*) NKB cells  
52 (*Cd19<sup>hi</sup>CD74<sup>hi</sup>CD79a<sup>hi</sup>Ly6d<sup>hi</sup>Igkc<sup>hi</sup>Iglc2<sup>hi</sup>Iglc3<sup>hi</sup>*).

### 53 *T-cell Receptor Sequencing*

54 NK1.1<sup>+</sup>TCRβ<sup>+</sup> cells were isolated from hepatic non-parenchymal cells by FACS, and  
55 genomic DNA was extracted using DNAeasy mini kit (Qiagen). Mouse TCR sequencing  
56 was performed using the immunoSEQ Assay (Adaptive Biotechnologies). V, D, and J  
57 segments of the TCR were identified by multiplex PCR using forward primers in each V  
58 segment and reverse primers in each J segment. Detected template reads were normalized  
59 to total DNA content. Assessment of clonality and sequence overlap analyses were  
60 performed on immunoSEQ Analyzer 3.0 software (Adaptive Biotechnologies).

### 61 *Bacterial Culture, DNA Extraction, and 16S rRNA Sequencing*

62 Liver tissue samples were suspended in 500 μL sterile PBS, vortexed for 30 seconds and  
63 sonicated for 15 seconds. For bacterial culture, specimens were plated under aerobic or  
64 anaerobic conditions for 72 hours on Tryptic Soy Agar with 5% Sheep's Blood  
65 (Molecular Toxicology). For DNA extraction, samples were treated overnight with  
66 Proteinase K (2.5 μg/mL) at 55°C, as we described previously (2, 3). Total bacterial  
67 genomic DNA was purified from tissue and fecal samples using the QIAamp PowerFecal  
68 kit (Qiagen). DNA was quantified for concentration and purity initially by NanoDrop  
69 2000 spectrophotometer (Thermo Scientific), and further verified fluorometrically by

70 Quant-iT PicoGreen assay (Invitrogen) on SpectraMax M5 microplate reader (Molecular  
71 Devices), then stored at  $-20^{\circ}\text{C}$  until further analysis. For high-throughput 16S rRNA  
72 library preparation and sequencing, the V3–V4 hypervariable region of the 16S rRNA  
73 gene was amplified from the genomic DNA of murine and human fecal and liver tissue  
74 samples according to the Illumina 16S metagenomics protocol (Part #15044223 Rev. B)  
75 using two-step AMPure XP amplification (Beckman Coulter). The DNA concentration  
76 was adjusted to  $10\text{ ng}/\mu\text{L}$  for all analyses. PCR was performed using the primer set 341F  
77 ( $5'\text{-CCTACGGGNGGCWGCAG-3}'$ ) and 805R ( $5'\text{-GACTACHVGGGTATCTAATCC-}$   
78  $3'$ ), each with overhang adapter sequences (IDT) using  $2\times$  Kapa HiFi Hotstart ReadyMix  
79 DNA polymerase (KapaBiosystems). Samples were amplified in duplicate and purified  
80 using AMPure XP beads. Amplification was performed at  $95^{\circ}\text{C}$  (3 minutes), with 25  
81 cycles of  $95^{\circ}\text{C}$  (30 seconds),  $55^{\circ}\text{C}$  (30 seconds),  $72^{\circ}\text{C}$  (30 seconds), and final extension  
82 of  $72^{\circ}\text{C}$  (5 minutes). Dual indices from Illumina Nextera XT index kits (Illumina) were  
83 added to target amplicons in a second PCR using  $2\times$  Kapa HiFi Hotstart ReadyMix DNA  
84 polymerase. PCR conditions were  $95^{\circ}\text{C}$  (3 minutes), with 8 cycles of  $95^{\circ}\text{C}$  (30 seconds),  
85  $55^{\circ}\text{C}$  (30 seconds),  $72^{\circ}\text{C}$  (30 seconds), and final extension of  $72^{\circ}\text{C}$  (5 minutes). After  
86 each PCR cycle, AMPure XP bead-purified libraries were checked for purity by  
87 nanodrop, quantified by PicoGreen assay, and size confirmed on agarose gels. Negative  
88 controls were included in all sequencing runs. Equimolar amounts of the generated  
89 libraries with dual index were combined and quantified fluorometrically. The pooled  
90 amplicon library was denatured, diluted, and sequenced on an Illumina MiSeq platform  
91 using MiSeq Reagent Kit v3 (600 cycles) and 300-bp paired-end sequencing protocol.  
92 *Quality Control*

93 For adequate quality control, we used best practices of previously published studies (4-6).  
94 All the samples were collected using the standard sterile technique (Supplemental Video  
95 1). A new set of sterile instruments was used for each animal. We maintained consistency  
96 in DNA extraction techniques and reagents throughout. All PCR reagents were  
97 periodically checked for environmental contaminants using 16S universal primers. To  
98 control for the quality of our sequencing, we used both predetermined mock communities  
99 (such as *E. coli*, *Streptococcus mutans*, and *Fusobacterium nucleatum*) and ‘negative’  
100 (reagent-only) controls, to check background contamination and the rate of sequencing  
101 errors. We included both of these controls in each of the sequencing runs. The blanks/no  
102 template controls used in each experiment are reagent controls (containing no DNA) that  
103 have passed through every stage of library preparation such as Amplicon PCR, Index  
104 PCR, and sequencing step along with other DNA samples.

#### 105 *Phylogenetic and Statistical Analyses*

106 The Illumina-generated sample and reagent control sequence data were processed using  
107 the quantitative insights into microbial ecology software package (QIIME) v1.8.0 (7, 8).  
108 Reads were quality checked with FASTQ (9) and edited using Cutadapt (10) to remove  
109 primer sequences and filter sequences to a minimum length of 100 nucleotides. The  
110 forward and reverse Illumina reads were joined using the `join_paired_ends.py` script and  
111 joined reads were demultiplexed and quality filtered using the `split_libraries_fastq.py`  
112 script (11). The filtered sequences were clustered into OTUs based on a 97% similarity  
113 threshold using UCLUST algorithm with `pick_open_reference_otus.py` using the  
114 GreenGenes database as reference (12). The chimeric sequences were removed by  
115 `parallel_identify_chimeric_seqs.py` and a phylogeny was created with

116 make\_phylogeny.py using default parameters (13). 16S rRNA sequencing data are  
117 available via NCBI Sequence Read Archive accession number PRJNA770739. Code is  
118 available at [https://github.com/mariaasierra/Liver\\_Microbiome](https://github.com/mariaasierra/Liver_Microbiome). The microbial relative  
119 abundance plots were generated in R using phyloseq (14).  $\alpha$ -diversity plots, such as  
120 richness estimators (observed OTUs, ACE, and Chao1) and diversity estimators  
121 (Shannon index, Simpson index, and PD), were generated using R-phyloseq and vegan.  
122 Two-tailed Student t test was also used when two groups were compared.  $\beta$ -diversity  
123 PCoA plots were computed between samples by weighted UniFrac distances, and  
124 significance was assessed by the Adonis test (PERMANOVA). LEfSe tool was used to  
125 identify differentially significant bacterial taxa between the cohorts with the Kruskal–  
126 Wallis test (15). Metagenomic analysis of 16S results was performed using the PICRUST  
127 package in Python (16), using a standard workflow (17). The resulting metagenomic  
128 predictions were analyzed by the Student t test or simple linear regression using  
129 GraphPad Prism 8 (GraphPad Software). *P* values < 0.05 were considered statistically  
130 significant.  
131

# Supplemental Figure 1

**A**

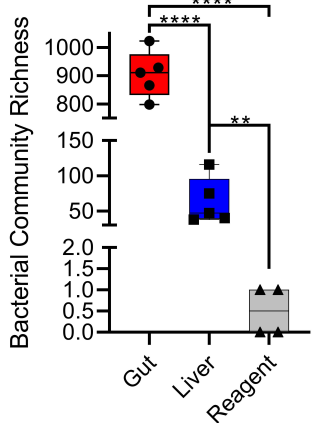

**B**

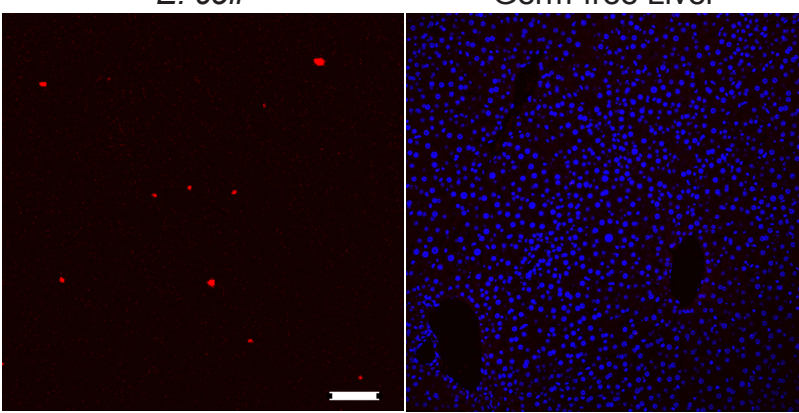

**C**

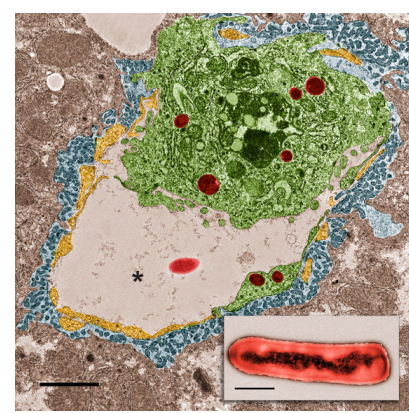

**D**

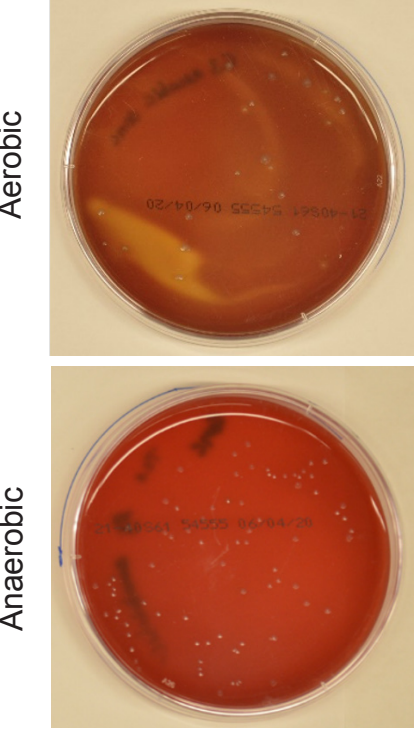

**E**

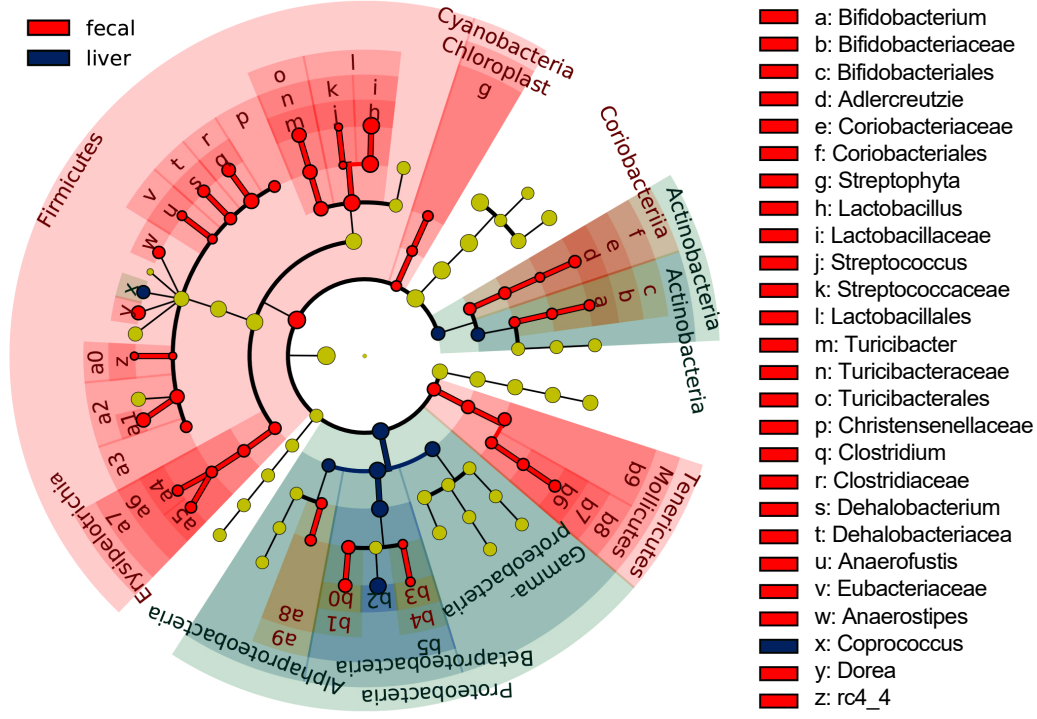

**F**

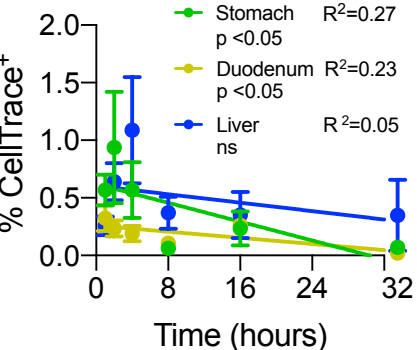

**G**

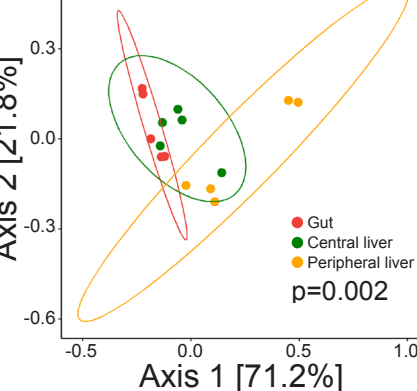

**H**

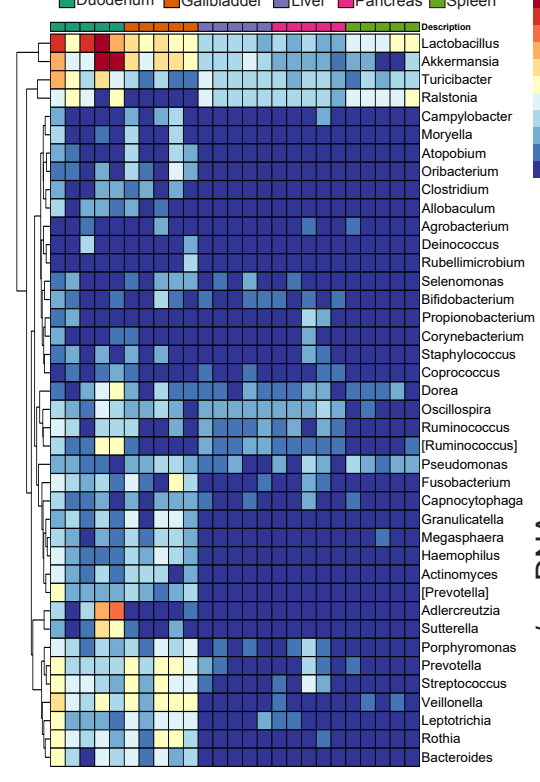

**I**

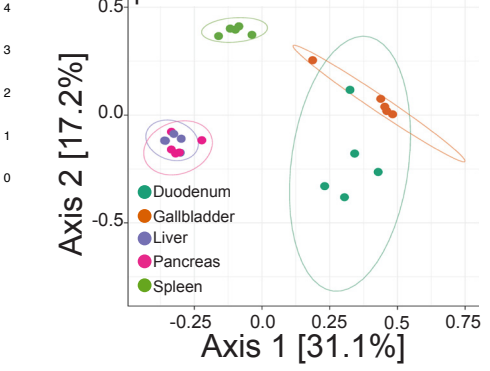

**J**

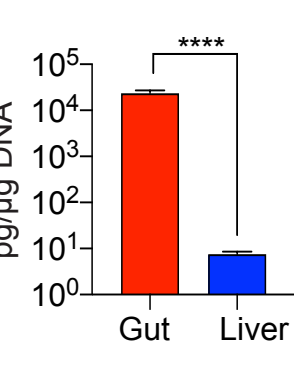

**K**

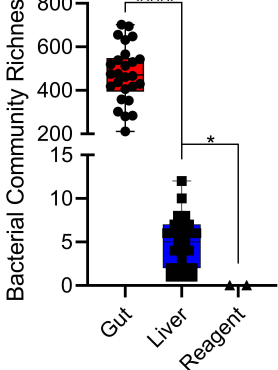

## Supplemental Figure Legends

132

### 133 **Supplemental Figure 1. The liver and gut microbiomes are distinct.**

134 **(A)** The liver and gut microbiomes in 6-week-old female WT mice (n=5) and reagent-  
135 only controls (n=4) were analyzed for Observed Taxonomic Units (OTUs) (\*\*p<0.01,  
136 \*\*\*\*p<0.0001). Of the reagent-only controls, two had 0 reads past filtering; one had 1  
137 assigned taxon (*Pseudomonas*) and one had 6 unassigned taxa.

138 **(B)** *E. coli* were stained using a universal 16S FISH probe vs germ-free mouse liver  
139 tissue control (scale bar = 20µm).

140 **(C)** Transmission electron microscopy image of mouse liver tissue showing bacteria (red)  
141 in relation to endothelial cells (yellow), Kupffer cells (green), the space of Disse (blue),  
142 and the sinusoidal space (\*, scale bar = 2µm); inset, transmission electron microscopy  
143 image of cultured bacteria (scale bar = 1µm).

144 **(D)** Mouse liver tissue cultured on tryptic soy agar with 5% sheep's blood plates for 72  
145 hours showing colony growth under aerobic and anaerobic conditions.

146 **(E)** Cladogram based on 16S rRNA sequencing of liver and gut microbiomes in 6-week-  
147 old female WT mice showing the significant differential bacterial abundances across the  
148 entire taxonomic hierarchy in the liver (blue) and gut (red) detected by LEfSe (n=10).

149 **(F)** Time course showing the prevalence of fluorescent-labeled *P. gingivalis* in stomach  
150 contents, duodenal contents, or liver tissue identified by flow cytometry, with linear  
151 regression analysis from 1 hour to 32 hours (n=3 mice / time point).

152 **(G)** Weighted PCoA plots based on Bray-Curtis dissimilarity matrix showing distinct  
153 clusters for gut microbiota and liver microbiota collected from the central or peripheral



154 liver. Clusters were determined by pairwise PERMANOVA. X- and Y-axes indicate  
155 percent variation and the ellipses indicate 95% CI.

156 **(H)** Heatmap showing log<sub>2</sub>-transformed relative abundances of the most highly  
157 represented bacterial genera in duodenum, gallbladder, liver, pancreas, and spleen.

158 **(I)** Weighted PCoA plots based on Bray-Curtis dissimilarity matrix showing clusters for  
159 microbiota collected from duodenum, gallbladder, liver, pancreas, and spleen. Clusters  
160 were determined by pairwise PERMANOVA. X- and Y-axes indicate percent variation  
161 and the ellipses indicate 95% CI.

162 **(J)** Bacterial DNA content was measured in human gut and liver using qPCR (n=26;  
163 \*\*\*\*p<0.0001).

164 **(K)** The human liver and gut microbiomes (n=26) and reagent-only controls (n=2) were  
165 analyzed for Observed Taxonomic Units (OTUs) (\*p<0.05, \*\*\*\*p<0.0001). Both of the  
166 reagent-only controls had 0 reads past filtering.

167

## Supplemental Figure 2

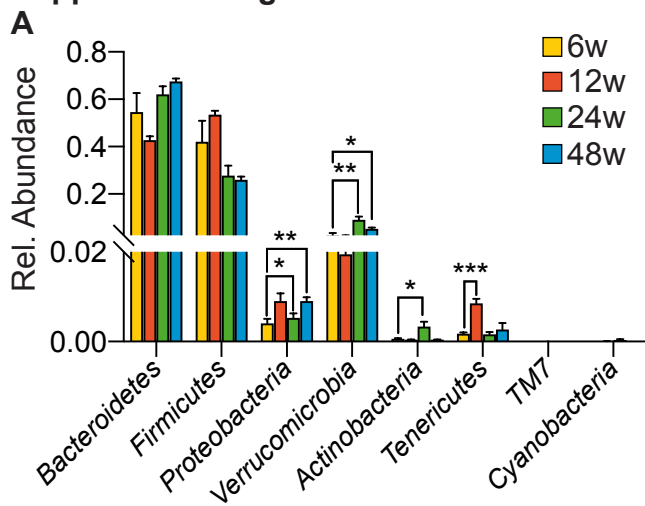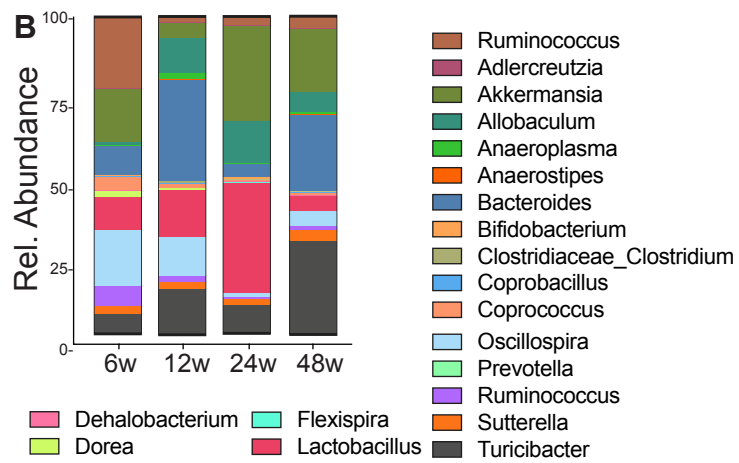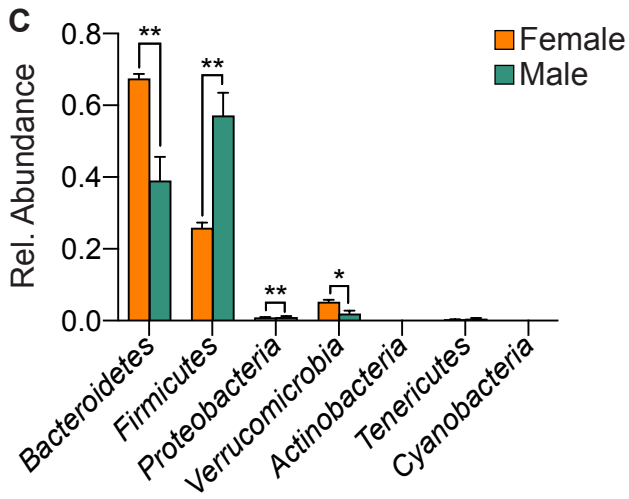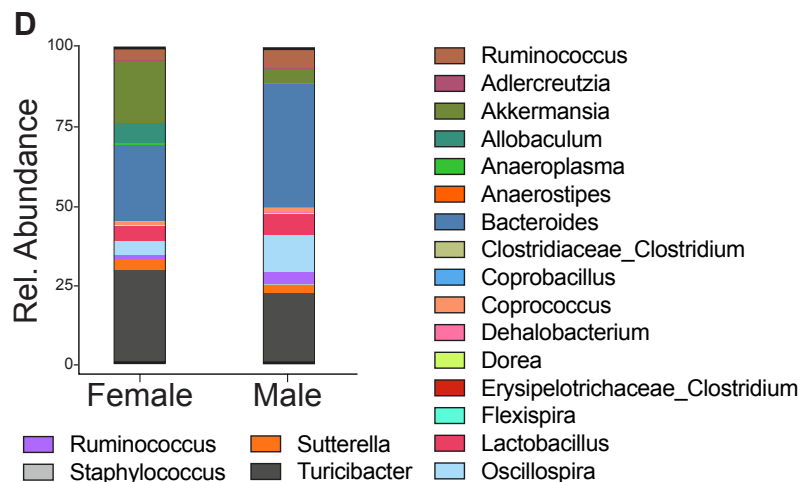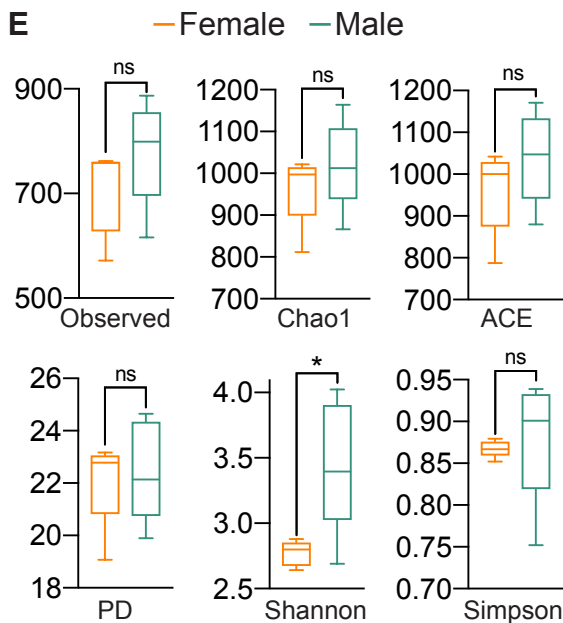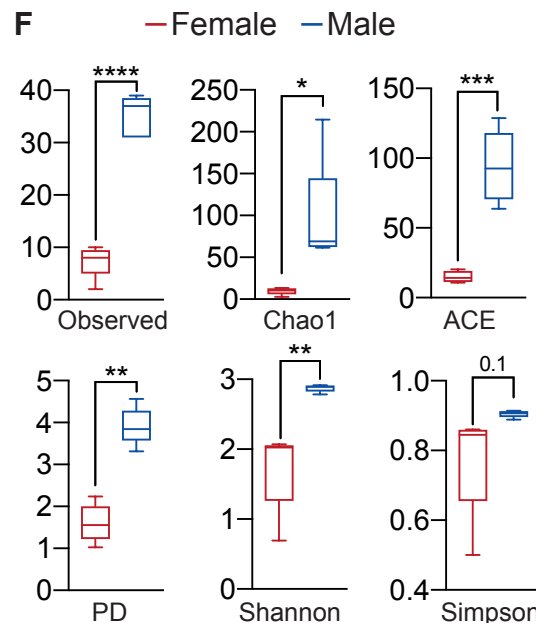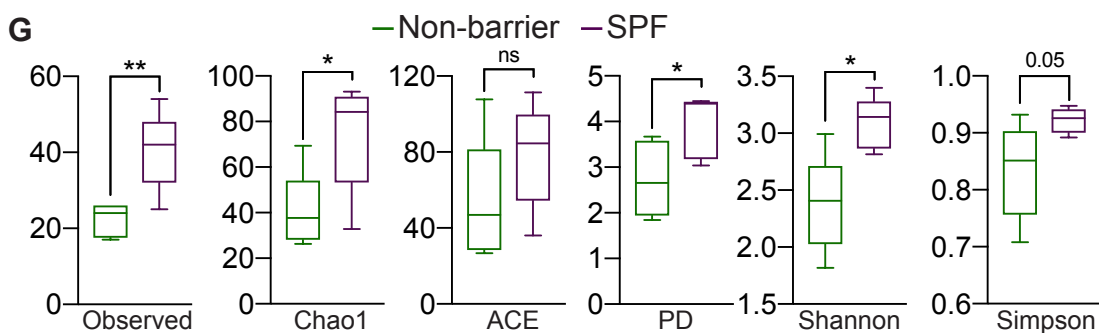

168 **Supplemental Figure 2. Fluctuations in the microbiome based on age, gender, and**  
169 **environment.**

170 **(A, B)** We comparatively analyzed the gut microbiome in female mice aged 6, 12, 24, or  
171 48 weeks by 16S rRNA sequencing. Taxonomic composition of microbiota in the gut  
172 were assigned to phylum (A) and genus (B) levels based on average percent relative  
173 abundance (n=5/group).

174 **(C, D)** We comparatively analyzed the gut microbiome in female and male mice aged 48  
175 weeks by 16S rRNA sequencing. Taxonomic composition of microbiota in the gut were  
176 assigned to phylum (C) and genus (D) levels based on average percent relative abundance  
177 (n=5/group).

178 **(E, F)** The gut (E) and liver (F) microbiomes in female and male mice were analyzed for  
179  $\alpha$ -diversity measures including Observed OTUs, Chao1, ACE, PD, Shannon, and Simpson  
180 indices (n=5/group; \*p<0.05, \*\*p<0.01, \*\*\*p<0.001, \*\*\*\* p<0.0001).

181 **(G)** We comparatively analyzed the liver microbiome by 16S rRNA sequencing in  
182 cohorts of female mice obtained at 6 weeks of age from Jackson Labs and housed for 3  
183 weeks in SPF vs non-barrier facilities. Liver microbiota were analyzed for  $\alpha$ -diversity  
184 measures (n=5/group; \*p<0.05, \*\*p<0.01).

185

# Supplemental Figure 3

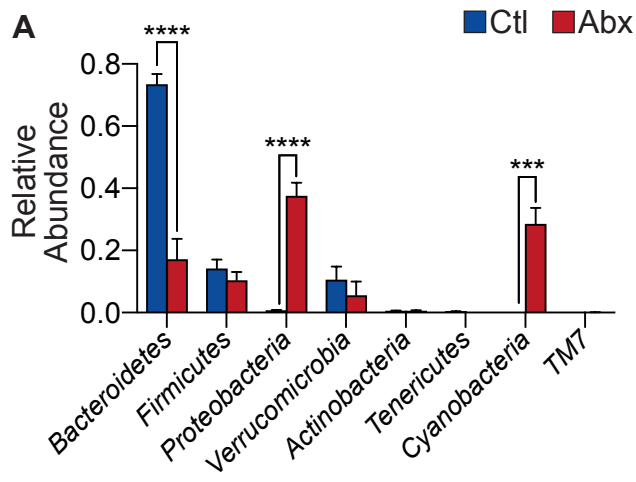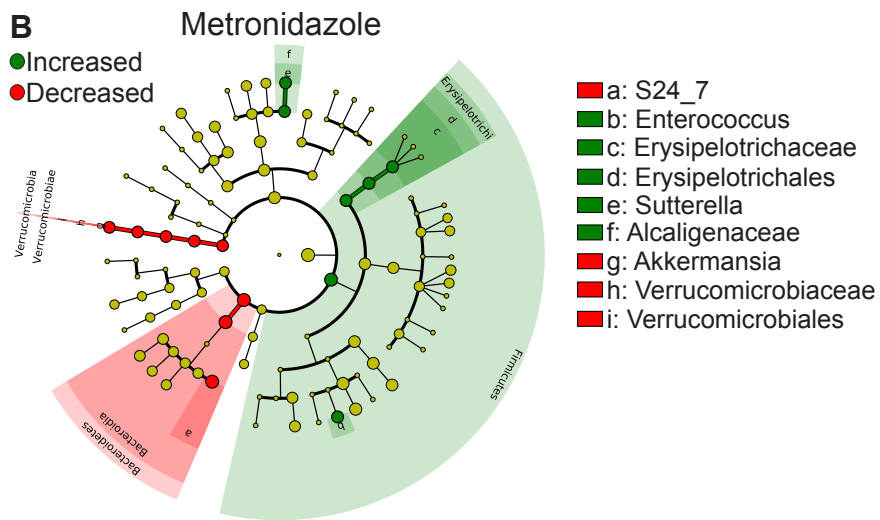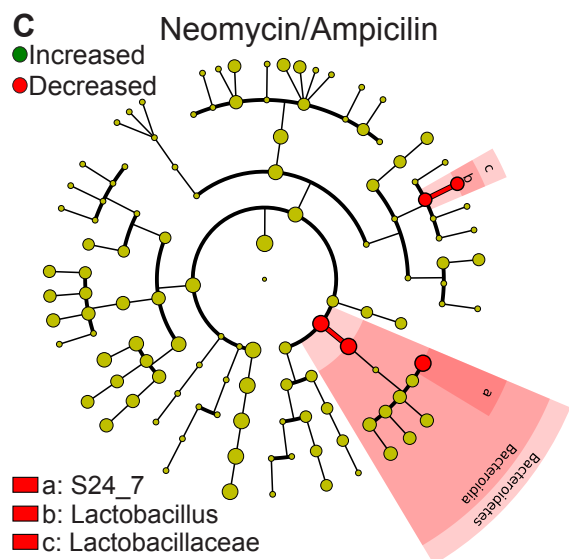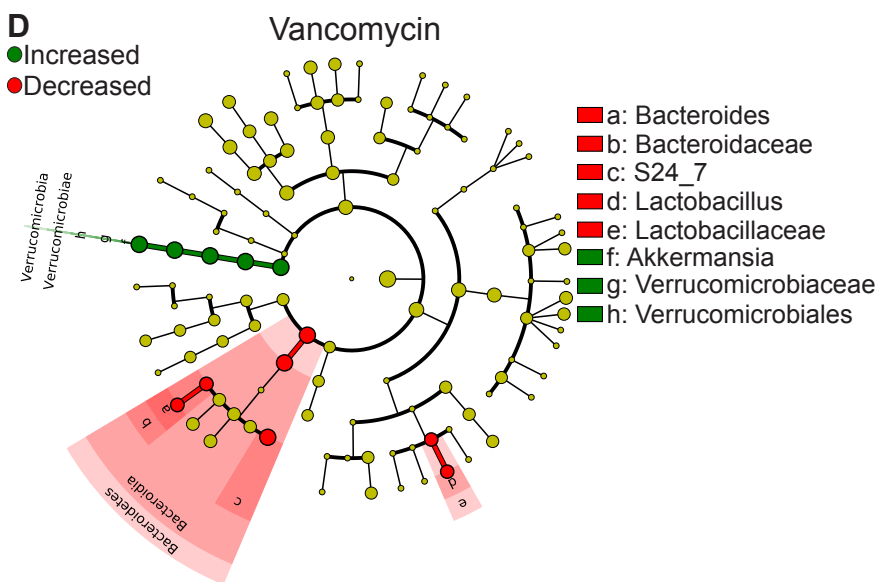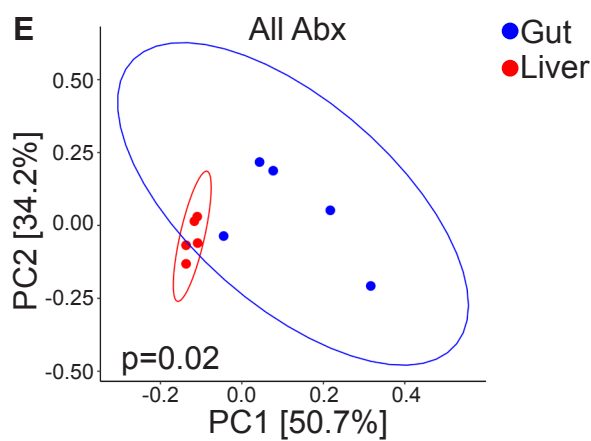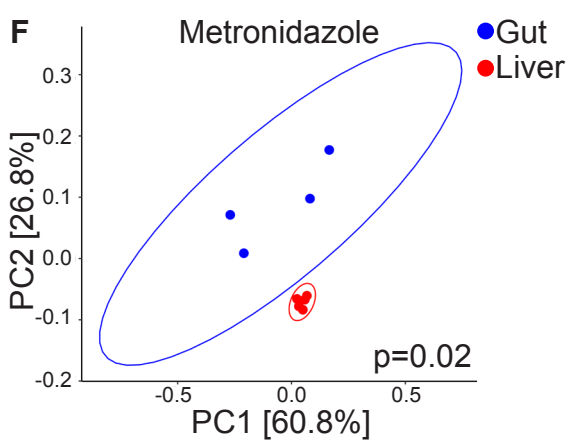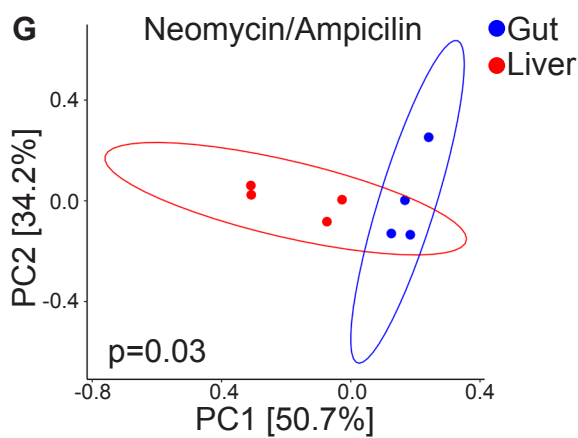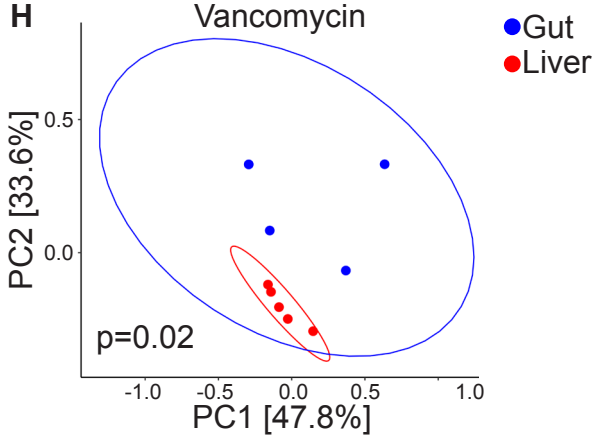

186 **Supplemental Figure 3. Alterations in the liver microbiome with antimicrobial**  
187 **therapy.**

188 **(A)** Taxonomic composition of microbiota assigned to phylum level in the gut of mice  
189 treated with broad-spectrum antibiotics or vehicle determined by 16S rRNA sequencing  
190 (n=5/group; \*\*\*p<0.001, \*\*\*\*p<0.0001).

191 **(B-D)** Cladograms showing significant differential abundances of bacteria in the liver  
192 across the entire taxonomic hierarchy detected by LEfSe after treatment of 6-week-old  
193 female mice with the indicated selective oral antibiotic regimen vs vehicle.

194 **(E-H)** Weighted PCoA plots of gut and liver microbiota in 6-week-old female mice  
195 treated with broad-spectrum antibiotics (E) or the indicated selective oral antibiotic  
196 regimen (F-H) based on Bray-Curtis dissimilarity matrix. Clusters were determined by  
197 pairwise PERMANOVA. X- and Y-axes indicate percent variation and the ellipses  
198 indicate 95% CI.

199

# Supplemental Figure 4

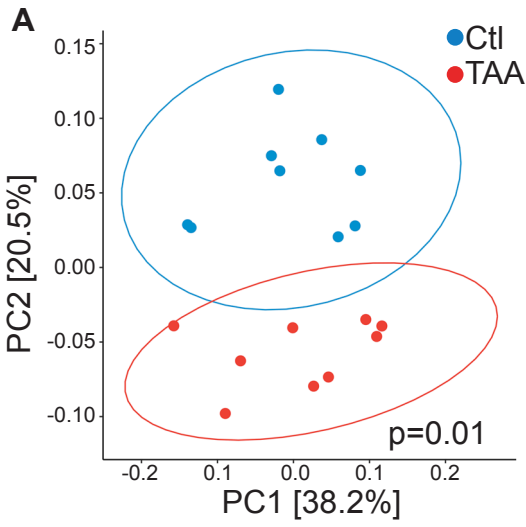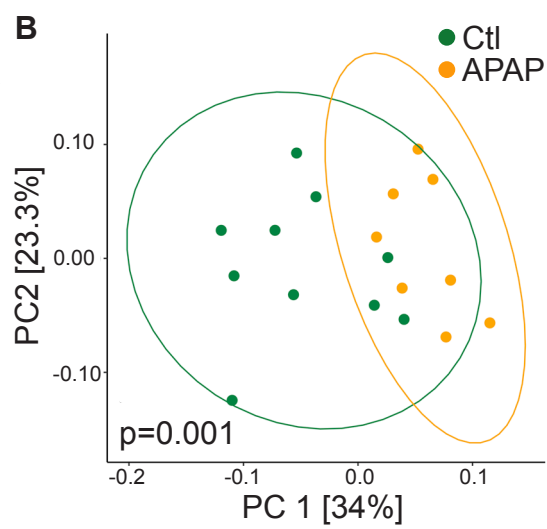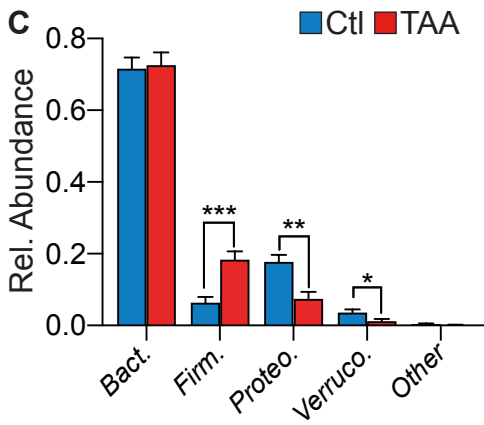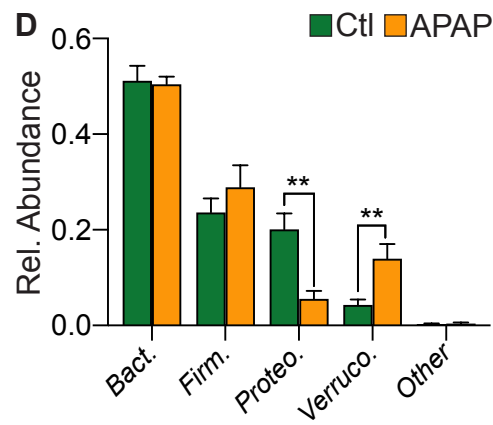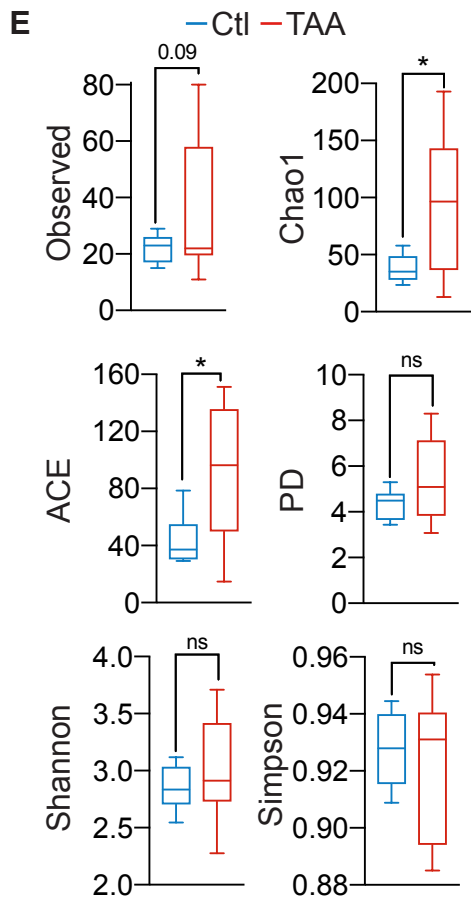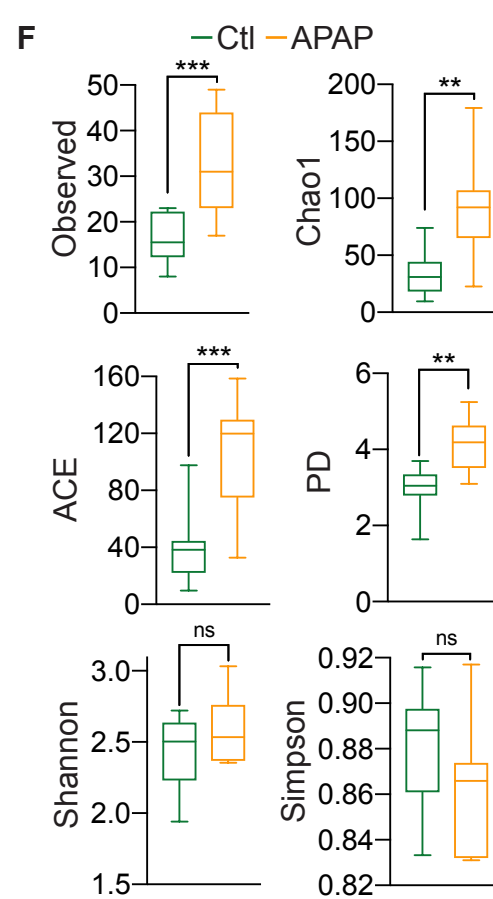

200 **Supplemental Figure 4. Acute or chronic liver disease reprogram the hepatic**  
201 **microbiome.**

202 **(A, B)** Weighted PCoA plots of liver microbiota in 24-week-old female mice treated with  
203 vehicle vs TAA (A) or 6-week-old female mice treated with vehicle vs APAP (B) based  
204 on Bray-Curtis dissimilarity matrix. Clusters were determined by pairwise  
205 PERMANOVA. X- and Y-axes indicate percent variation and the ellipses indicate 95%  
206 CI. Each dot represents data from one mouse.

207 **(C, D)** Taxonomic composition of microbiota assigned to phylum level in the liver of 24-  
208 week-old female mice treated with vehicle vs TAA (C) or 6-week-old female mice  
209 treated with vehicle vs APAP (D) determined by 16S rRNA sequencing (\* $p < 0.05$ ,  
210 \*\* $p < 0.01$ , \*\*\* $p < 0.001$ ).

211 **(E, F)** The liver microbiomes in mice treated with vehicle vs TAA (E) or APAP (F) were  
212 analyzed for  $\alpha$ -diversity measures including Observed OTUs, Chao1, ACE, PD, Shannon,  
213 and Simpson indices (\* $p < 0.05$ , \*\* $p < 0.01$ , \*\*\* $p < 0.001$ ).

214

# Supplemental Figure 5

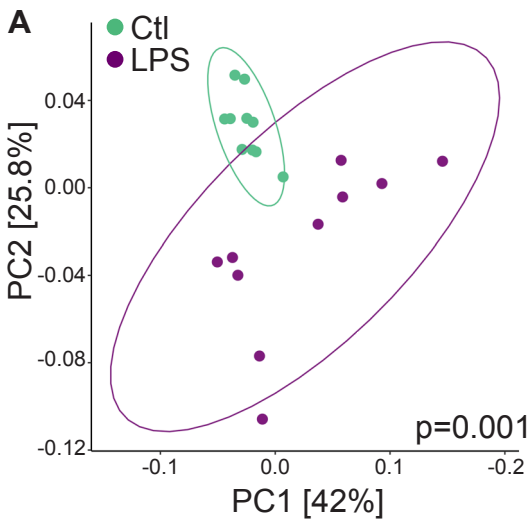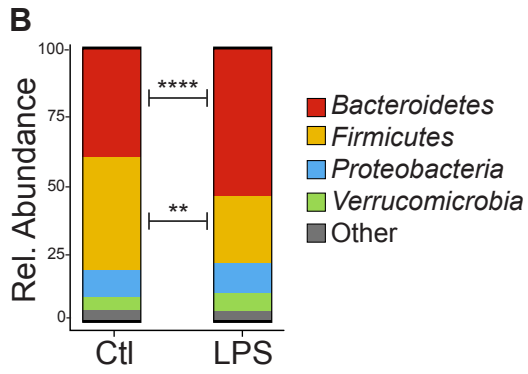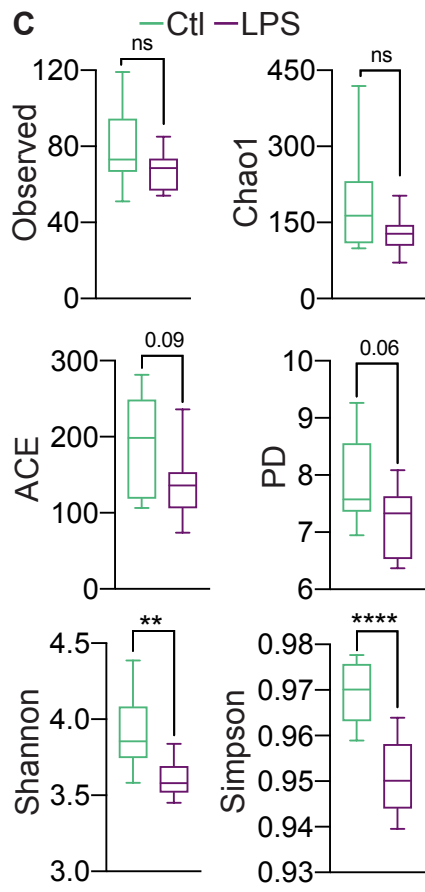



215 **Supplemental Figure 5. LPS administration reprograms the hepatic microbiome.**  
216 **(A)** Weighted PCoA plots of liver microbiota in 6-week-old female mice treated with  
217 vehicle vs LPS based on Bray-Curtis dissimilarity matrix. Clusters were determined by  
218 pairwise PERMANOVA. X- and Y-axes indicate percent variation and the ellipses  
219 indicate 95% CI. Each dot represents data from one mouse.  
220 **(B)** Taxonomic composition of microbiota assigned to phylum level in the liver of 6-  
221 week-old female mice treated with vehicle vs LPS determined by 16S rRNA sequencing  
222 (\*\*p<0.01, \*\*\*\*p<0.0001).  
223 **(C)** The liver microbiomes in mice treated with vehicle vs LPS were analyzed for  $\alpha$ -  
224 diversity measures including Observed OTUs, Chao1, ACE, PD, Shannon, and Simpson  
225 indices (\*\*p<0.01, \*\*\*\*p<0.0001).  
226

# Supplemental Figure 6

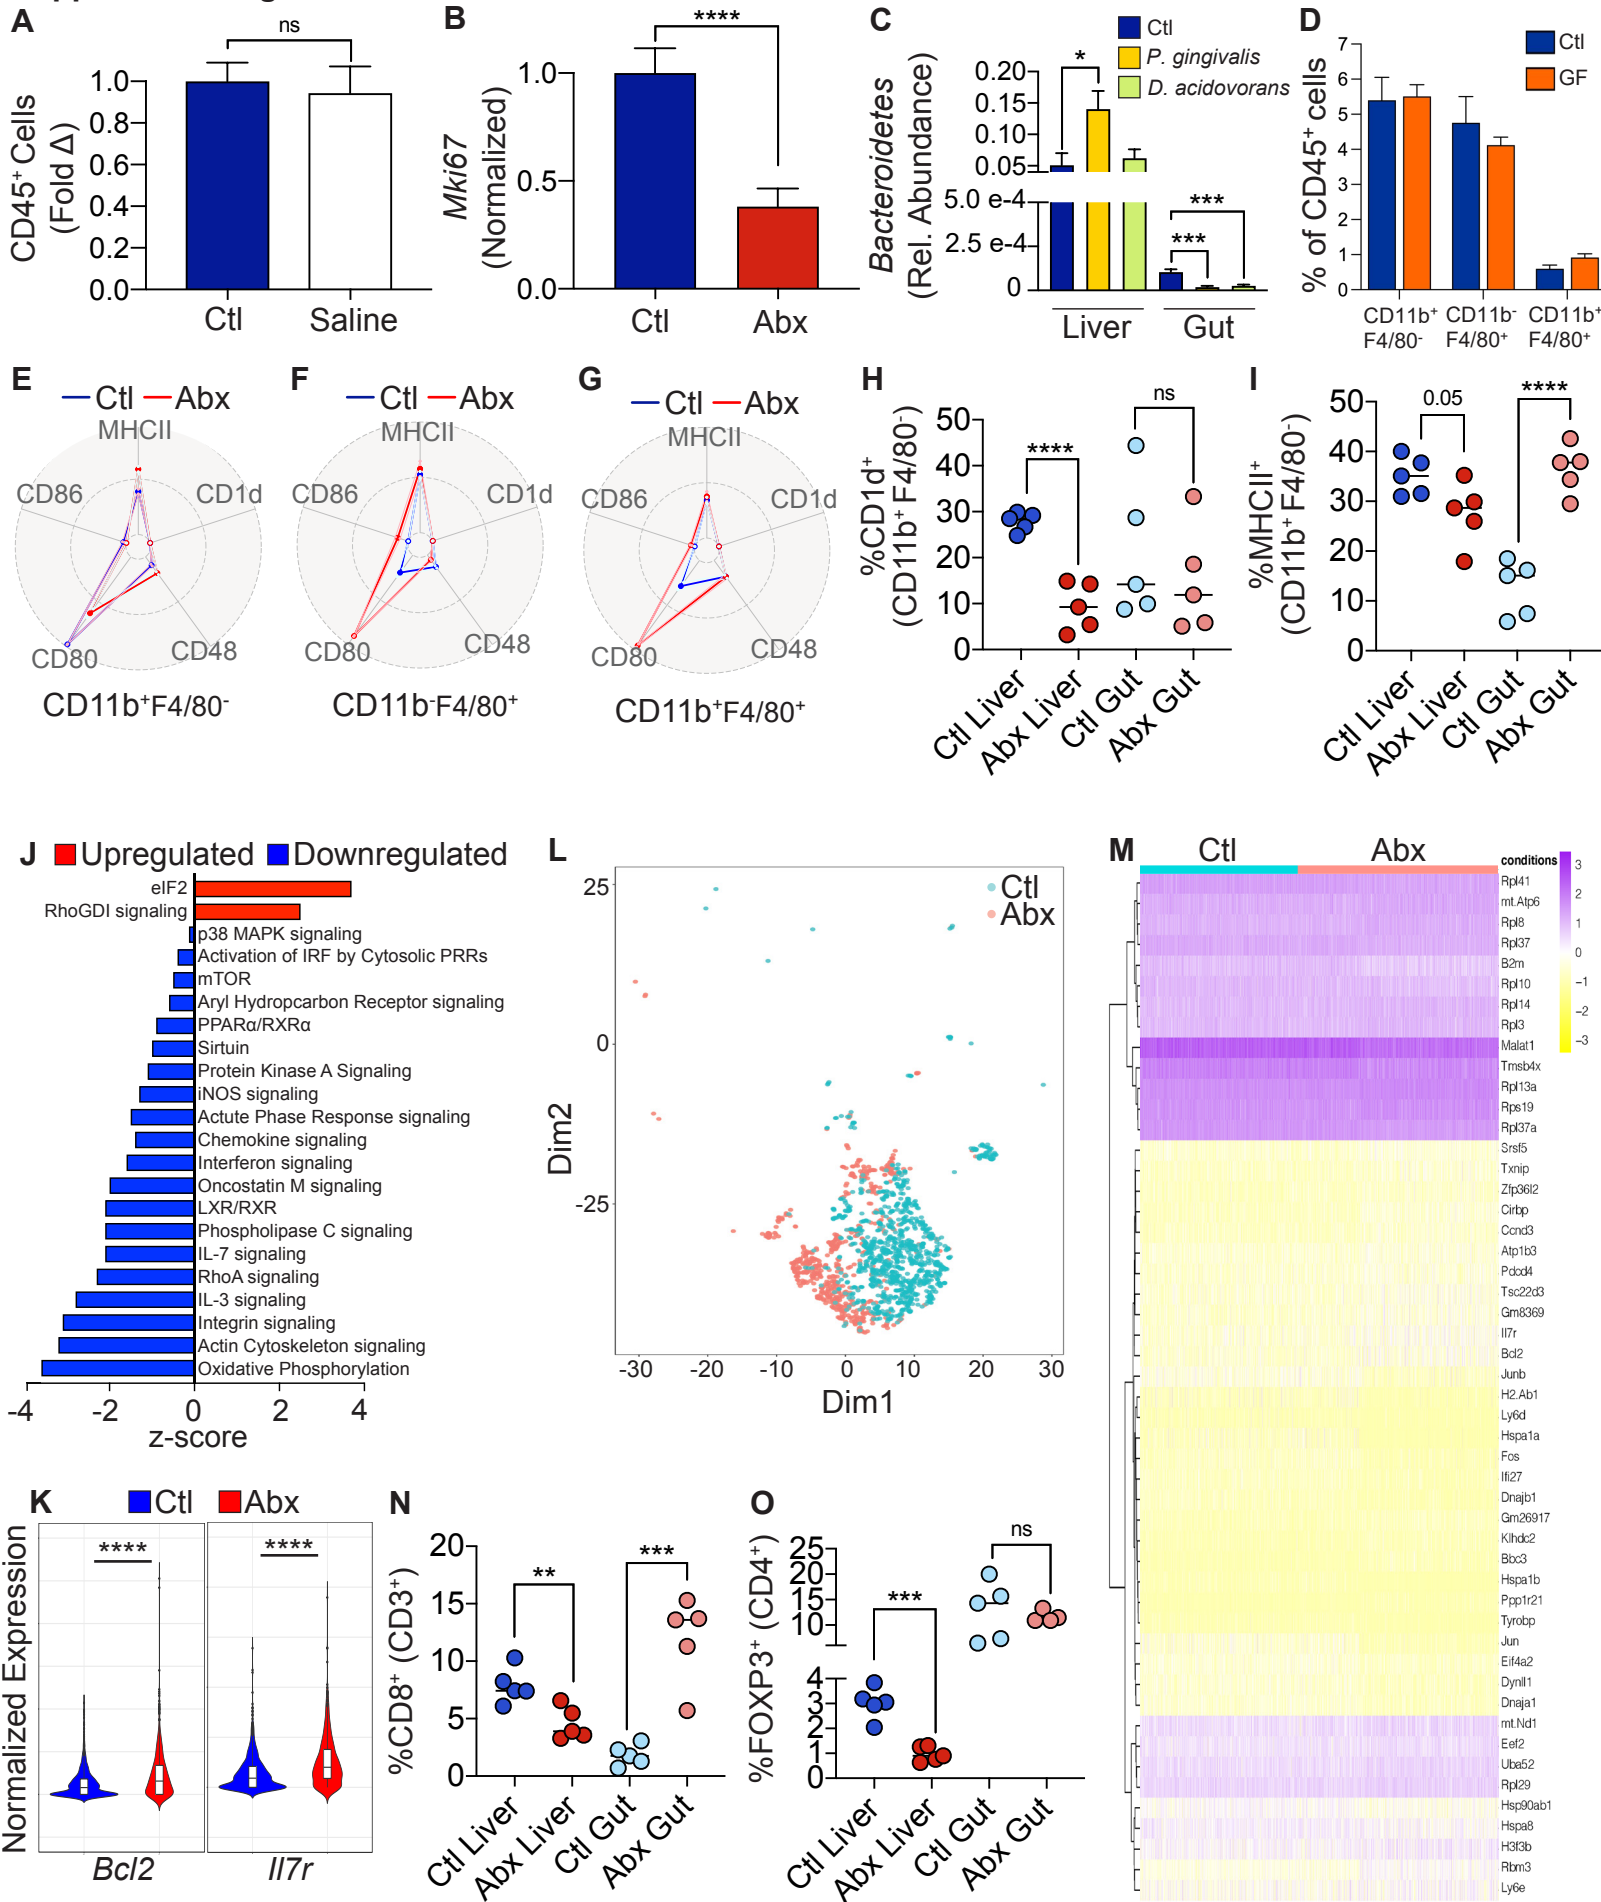

227 **Supplemental Figure 6. Liver myeloid and conventional T cell phenotypes are**  
228 **modulated by antimicrobial therapy.**

229 (A) The number of leukocytes in the liver was comparatively analyzed in mice mock-  
230 treated or treated with saline gavage. Data are representative of experiments performed  
231 twice in replicates of 5.

232 (B) Mice were treated with broad-spectrum antibiotics or vehicle. CD45<sup>+</sup> liver leukocytes  
233 were purified by FACS and analyzed by single cell RNAseq as in Figure 5A. Bar graph  
234 comparing normalized log expression of *Mki67* for both treatment groups  
235 (\*\*\*\*p<0.0001).

236 (C) 6-week-old female mice were treated with broad-spectrum antibiotics for and then  
237 repopulated with *D. acidovorans*, *P. gingivalis*, or vehicle by gastric gavage (n=10 mice /  
238 group). Relative abundance of phylum *Bacteroidetes* in the liver and the gut was  
239 determined by 16S rRNA sequencing (\*p<0.05, \*\*\*p<0.001).

240 (E) The frequency of diverse APC subsets among CD45<sup>+</sup> liver leukocytes in control  
241 (n=5) and germfree (n=10) mice was determined by flow cytometry (all pairwise  
242 comparisons n.s.).

243 (E-G) Expression of activation markers in spleen APC subsets in mice treated with  
244 broad-spectrum antibiotics or vehicle was determined by flow cytometry and is depicted  
245 in spider plots. Data are representative of experiments performed twice in replicates of 5.

246 (H, I) Expression of activation markers in liver and gut APC subsets in mice treated with  
247 broad-spectrum antibiotics or vehicle was determined by flow cytometry (n=5/group).  
248 This experiment was performed twice.

249 **(J)** Mice were treated with broad-spectrum antibiotics or vehicle. CD45<sup>+</sup> liver leukocytes  
250 were purified by FACS and analyzed by single cell RNAseq as in Figure 5A. The  
251 myeloid cell cluster was analyzed by IPA and differentially regulated pathways for  
252 antibiotic vs vehicle treatment are shown.

253 **(K-M)** Mice were treated with broad-spectrum antibiotics or vehicle. CD45<sup>+</sup> liver  
254 leukocytes were purified by FACS and analyzed by single cell RNAseq as in Figure 5A.

255 **(K)** Violin plots comparing normalized log expression of *Bcl2* and *Il7r* in the  
256 conventional T cell cluster for both treatment groups (\*\*\*\*p<0.0001). **(L)** The respective  
257 conventional T cell populations are shown in a t-SNE plot and coded by treatment group.

258 **(M)** Heatmap showing relative expression of the top 50 differentially expressed genes in  
259 the conventional T cell cluster between treatment groups.

260 **(N, O)** Frequency of **(N)** CD8<sup>+</sup> T cells and **(O)** FOXP3<sup>+</sup> regulatory T cell subsets in the  
261 liver and gut of mice treated with broad-spectrum antibiotics or vehicle were determined  
262 by flow cytometry (n=5/group).

# Supplemental Figure 7

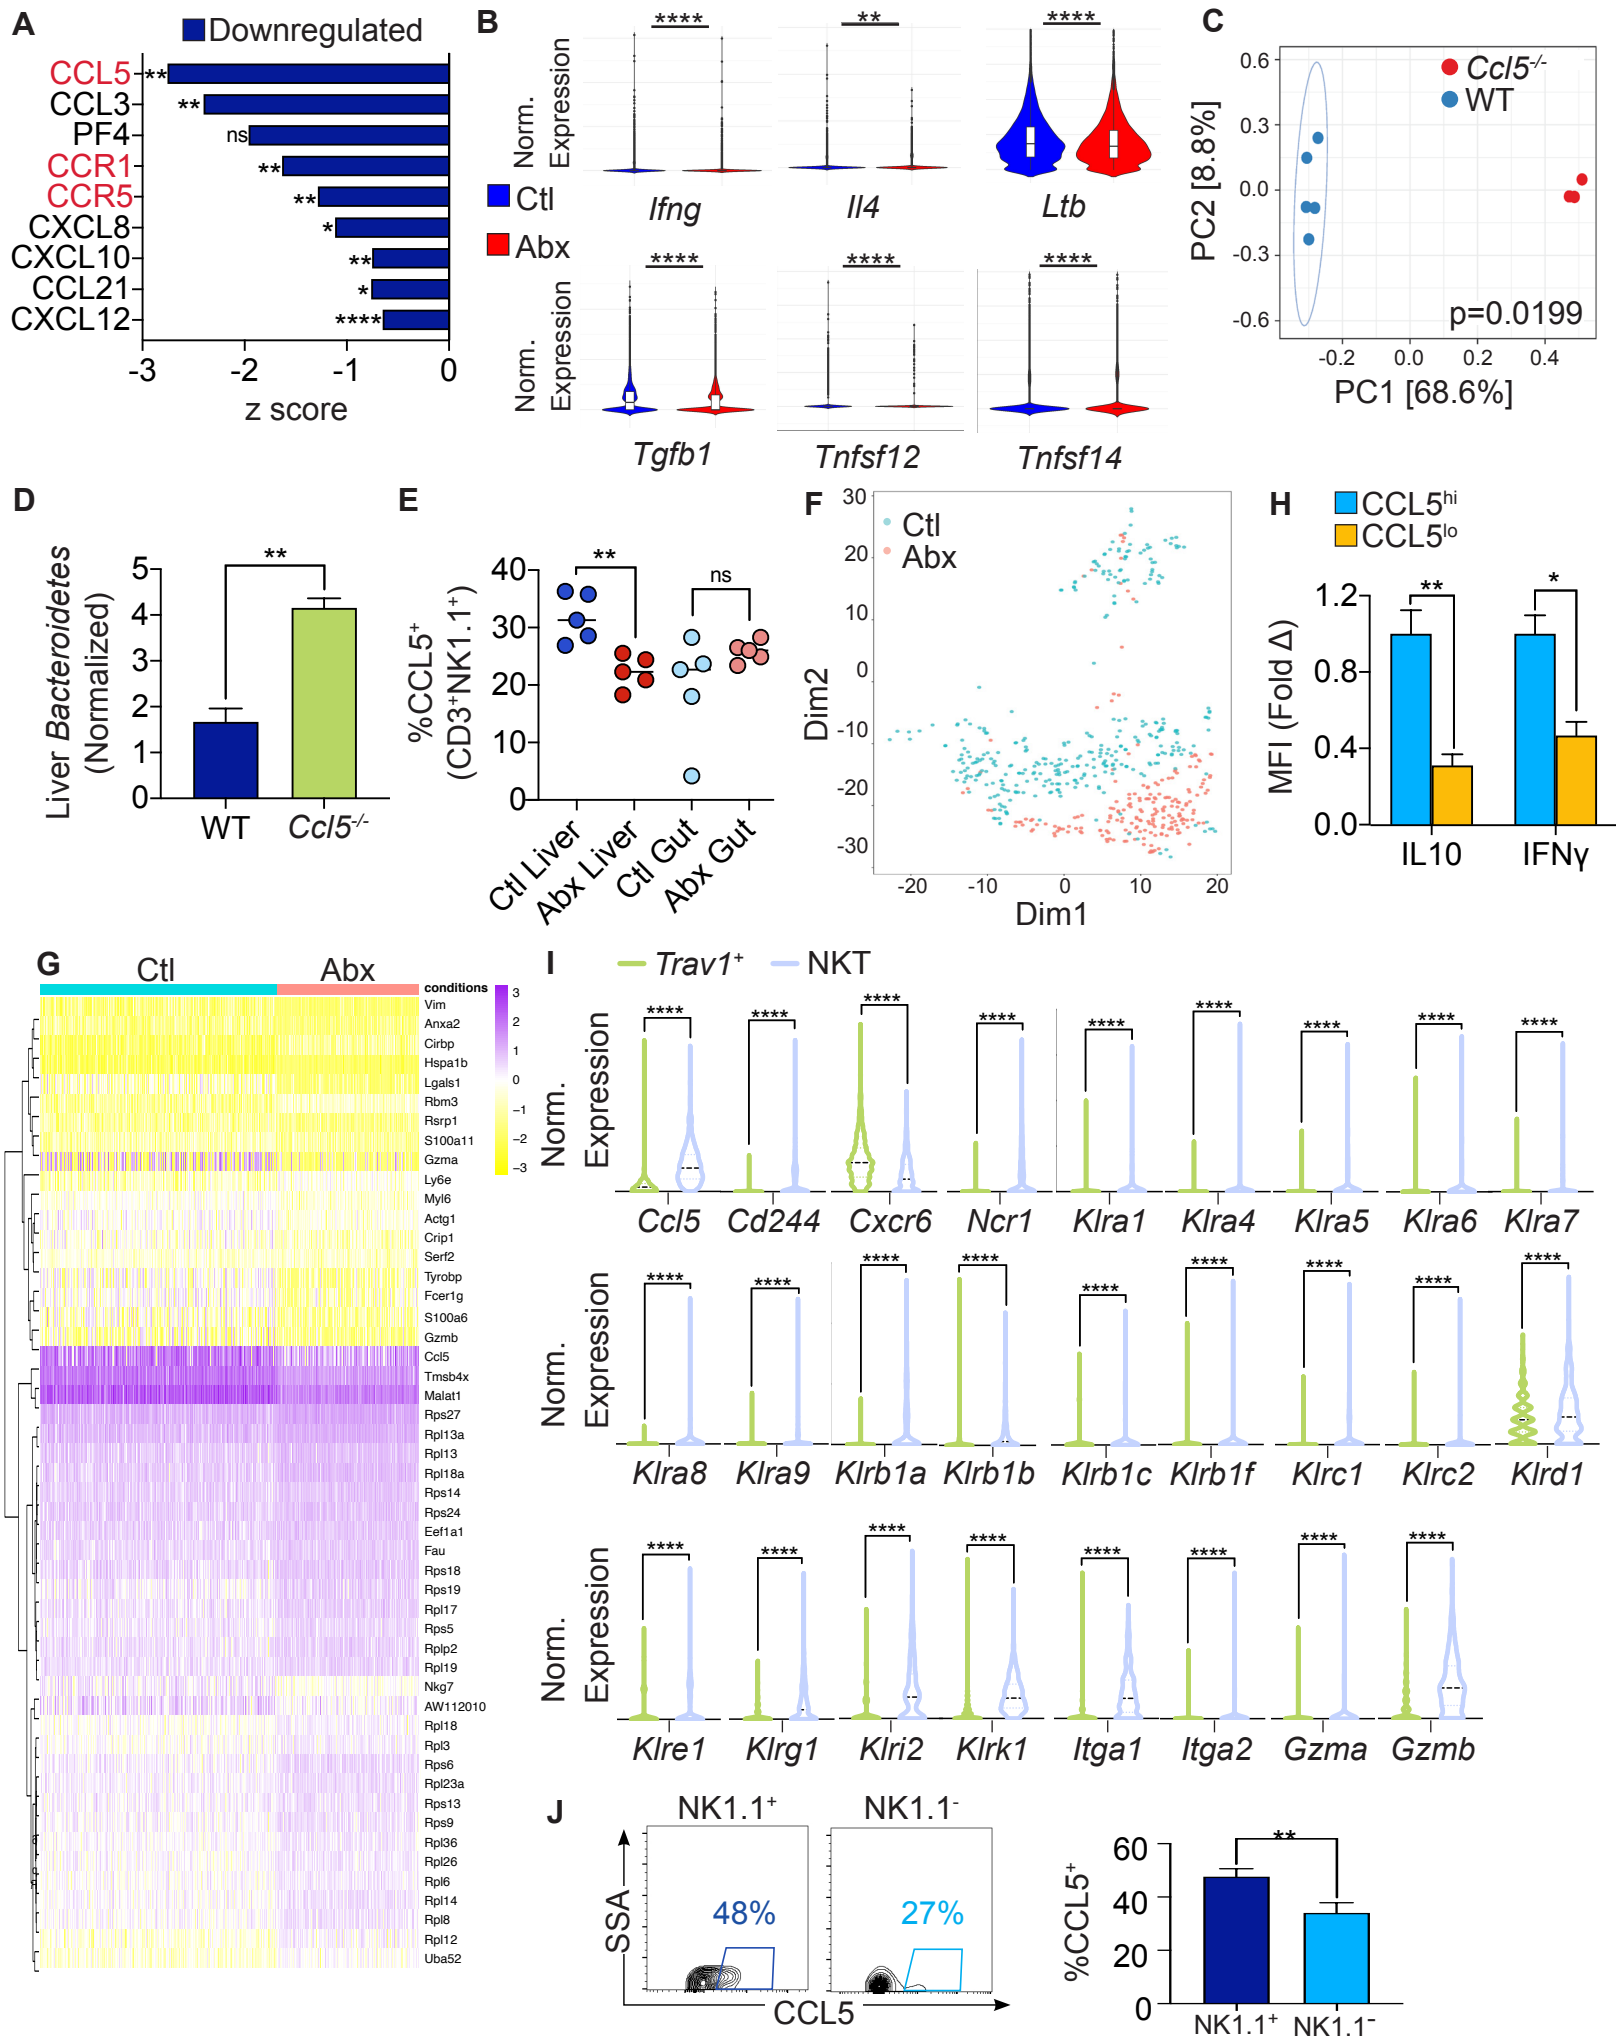

263 **Supplemental Figure 7. The microbiome modulates the phenotype of hepatic NKT**  
264 **cells.**

265 **(A)** Mice were treated with broad-spectrum antibiotics or vehicle. CD45<sup>+</sup> liver leukocytes  
266 were purified by FACS and analyzed by single cell RNAseq as in Figure 5A. The NK1.1<sup>+</sup>  
267 lymphocyte cluster was analyzed by Upstream analysis and differentially regulated  
268 chemokine signaling pathways for antibiotic vs vehicle treatment are shown (\*p<0.05,  
269 \*\*p<0.01, \*\*\*\*p<0.0001).

270 **(B)** Mice were treated with broad-spectrum antibiotics or vehicle. CD45<sup>+</sup> liver leukocytes  
271 were purified by FACS and analyzed by single cell RNAseq as in Figure 5A. Expression  
272 of chemokine genes not included in Figure 6A was compared in the overall leukocyte  
273 populations. Violin plots comparing normalized log expression of chemokine genes with  
274 significant differences for both treatment groups (\*\*, p<0.01, \*\*\*\*p<0.0001).

275 **(C)** Weighted PCoA plots based on Bray-Curtis dissimilarity matrix. Each symbol  
276 represents a sample from WT (n=5) or *Ccl5*<sup>-/-</sup> (n=3) liver. Clusters were determined by  
277 pairwise PERMANOVA. X- and Y-axes indicate percent variation and ellipses indicate  
278 95% CI.

279 **(D)** Relative abundance of phylum *Bacteroidetes* in the livers of WT (n=5) and *Ccl5*<sup>-/-</sup>  
280 (n=3) mice was determined by 16S rRNA sequencing (\*\*p<0.01).

281 **(E)** Expression of CCL5 in liver and gut CD3<sup>+</sup>NK1.1<sup>+</sup> cells in mice treated with broad-  
282 spectrum antibiotics or vehicle was determined by flow cytometry (n=5/group). This  
283 experiment was performed twice.

284 **(F, G)** Mice were treated with broad-spectrum antibiotics or vehicle. CD45<sup>+</sup> liver  
285 leukocytes were purified by FACS, analyzed by single cell RNAseq as in Figure 5A, and

286 sub-clustered as in Figure 6F. (F) The respective NKT cell populations are shown in a t-  
287 SNE plot and coded by treatment group. (G) Heatmap showing relative expression of the  
288 top 50 differentially expressed genes between treatment groups in the NKT cell sub-  
289 cluster.

290 **(H)** Expression of IL10 and IFN $\gamma$  in CCL5<sup>lo</sup> and CCL5<sup>hi</sup> liver CD3<sup>+</sup>NK1.1<sup>+</sup> cells were  
291 determined by flow cytometry.

292 **(I)** Violin plots comparing normalized log expression of select genes in hepatic innate-  
293 like lymphocytes expressing at least one transcript of *Trav11* vs the hepatic NKT cell  
294 cluster (\*\*\*\*p<0.0001).

295 **(J)** NK1.1<sup>+</sup> and NK1.1<sup>-</sup> liver CD1d-PBS-57 tetramer<sup>+</sup> cells were comparatively analyzed  
296 by flow cytometry for expression of CCL5 (n=5; \*p<0.05).

297

**Supplemental Figure 8**

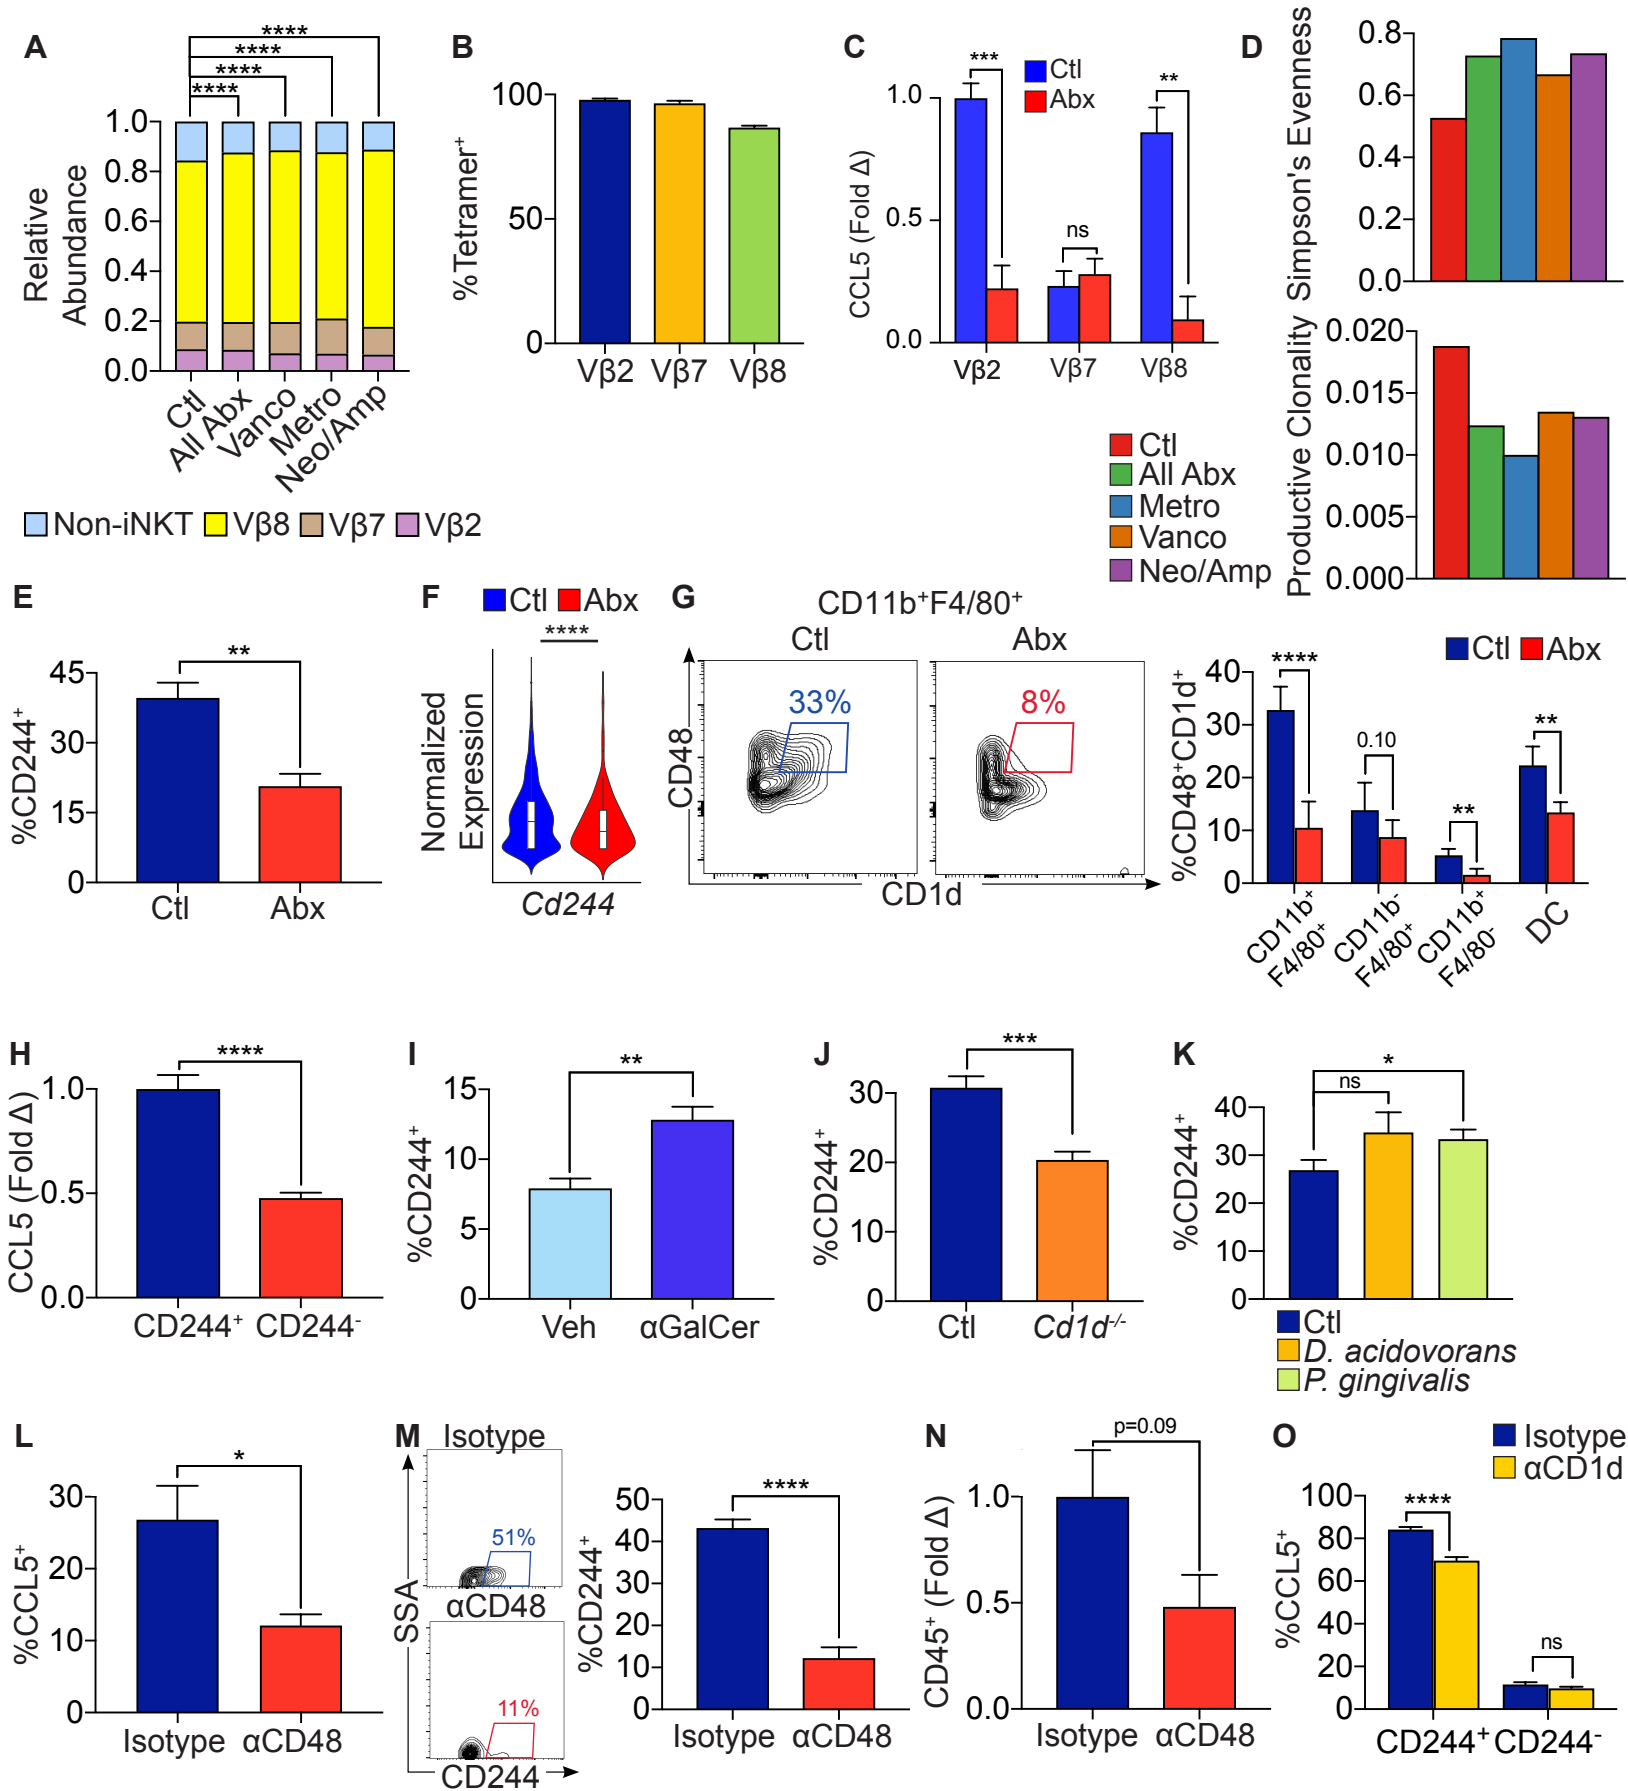



298 **Supplemental Figure 8. The CD48-CD244 axis drives NKT cell activation and CCL5**  
299 **expression.**

300 **(A)** TCR sequencing was performed on NKT cells from mice treated with broad-  
301 spectrum or selective antibiotics or vehicle. The changes in distribution of iNKT cell  
302 subsets is shown and analyzed by chi-square test (\*\*\*\*p<0.0001).

303 **(B)** Liver iNKT cell subsets were analyzed for CD1d tetramer binding by flow cytometry.  
304 The percentage of CD1d tetramer<sup>+</sup> cells is shown for each iNKT cell subset.

305 **(C)** Mice were treated with broad-spectrum antibiotics or vehicle. iNKT cell subsets were  
306 analyzed for expression of CCL5 by flow cytometry. Data are representative of  
307 experiments performed more than 4 times (n=5 mice/group; \*\*p<0.01, \*\*\*p<0.001).

308 **(D)** TCR sequencing of NKT cells was performed in mice treated with broad-spectrum or  
309 selective antibiotics or vehicle. Productive clonality and Simpson's evenness were  
310 determined.

311 **(E)** Mice were treated with broad-spectrum antibiotics or vehicle. NKT cell expression of  
312 CD244 was determined by flow cytometry. Data are representative of experiments  
313 performed 3 times in replicates of 5 (\*\*p<0.01).

314 **(F)** Mice were treated with broad-spectrum antibiotics or vehicle. CD45<sup>+</sup> liver leukocytes  
315 were purified by FACS and analyzed by single cell RNAseq as in Figure 5A. Violin plot  
316 comparing normalized log expression of *Cd244* in the NK1.1<sup>+</sup> lymphocyte cluster for  
317 both treatment groups (\*\*\*\*p<0.0001).

318 **(G)** Mice were treated with broad-spectrum antibiotics or vehicle. Liver APC subsets  
319 were analyzed for co-expression of CD1d and CD48. Data are representative of  
320 experiments performed 3 times in replicates of 5 (\*\*p<0.01, \*\*\*\*p<0.0001).

321 **(H)** Liver CD244<sup>+</sup> and CD244<sup>-</sup> NKT cells were analyzed for expression of CCL5 by flow  
322 cytometry. Data are representative of experiments performed 3 times in replicates of 5  
323 (\*\*\*\*p<0.0001).

324 **(I)** Hepatic leukocytes were stimulated *in vitro* with  $\alpha$ -GalCer or vehicle and NKT cells  
325 were assayed for CD244 expression. Data are representative of experiments performed 3  
326 times in replicates of 5 (\*\*p<0.01).

327 **(J)** Hepatic NKT cells from WT and *Cd1d*<sup>-/-</sup> mice were tested for expression of CD244  
328 by flow cytometry. Data are representative of experiments performed 3 times in  
329 replicates of 5 (\*\*\*p<0.001).

330 **(K)** 6-week-old female mice were treated with broad-spectrum antibiotics for and then  
331 repopulated with *D. acidovorans*, *P. gingivalis*, or vehicle by gastric gavage  
332 (n=10/group). Liver NKT cells were analyzed 1 week later for expression of CD244  
333 (\*p<0.05).

334 **(L-N)** NKT cell expression of CCL5 (L) and CD244 (M) and total hepatic CD45<sup>+</sup>  
335 leukocytic population (N) were compared in WT mice treated with a neutralizing  $\alpha$ CD48  
336 Ab or isotype control. Data are representative of experiments performed twice  
337 (n=5/group; \*p<0.05, \*\*\*\*p<0.0001).

338 **(O)** CD244<sup>+</sup> and CD244<sup>-</sup> NKT cell expression of CCL5 was compared in WT mice  
339 treated with a neutralizing  $\alpha$ CD1d Ab or isotype control (n=10/group; \*\*\*\*p<0.0001).

340

## Supplemental Tables

341

Table S1. Average threshold cycle (Ct) values for 16S rRNA qPCR.

|                        | Mouse | Human |
|------------------------|-------|-------|
| <b>Gut</b>             | 15.51 | 12.16 |
| <b>Liver</b>           | 31.24 | 25.92 |
| <b>Reagent control</b> | 36.37 | 35.70 |

342

343

Table S2. Characteristics of patients in study.

| Patient | Age (years) | Sex | Serum total bilirubin (mg/dL) | Diagnosis                 |
|---------|-------------|-----|-------------------------------|---------------------------|
| 1       | 57          | F   | 0.5                           | Benign hepatic cyst       |
| 2       | 52          | M   | 0.7                           | Chronic cholecystitis     |
| 3       | 71          | M   | 1.0                           | Hepatocellular carcinoma  |
| 4       | 83          | F   | 0.5                           | Colorectal adenocarcinoma |
| 5       | 71          | M   | 0.3                           | Gastric adenocarcinoma    |
| 6       | 67          | M   | 0.8                           | Hepatocellular carcinoma  |
| 7       | 56          | M   | 1.8                           | Hepatocellular carcinoma  |
| 8       | 55          | M   | 0.4                           | Hepatocellular carcinoma  |
| 9       | 55          | M   | 0.7                           | Chronic cholecystitis     |
| 10      | 30          | M   | 1.2                           | Colorectal adenocarcinoma |
| 11      | 63          | M   | 0.3                           | Gastric metaplasia        |
| 12      | 37          | F   | 0.5                           | Ovarian cancer            |
| 13      | 62          | F   | 0.2                           | Ampullary adenocarcinoma  |
| 14      | 48          | F   | 0.5                           | Colorectal adenocarcinoma |
| 15      | 72          | M   | 0.3                           | Hepatocellular carcinoma  |
| 16      | 55          | F   | 0.6                           | Benign pancreatic tumor   |
| 17      | 68          | F   | 0.4                           | Gallbladder cancer        |
| 18      | 61          | M   | 0.5                           | Hepatocellular carcinoma  |
| 19      | 43          | F   | 0.4                           | Breast adenocarcinoma     |
| 20      | 50          | F   | 0.9                           | Breast adenocarcinoma     |
| 21      | 49          | F   | 0.7                           | Benign hepatic adenoma    |
| 22      | 76          | F   | 0.5                           | Cholangiocarcinoma        |
| 23      | 51          | M   | 1.0                           | Hepatocellular carcinoma  |
| 24      | 77          | M   | 0.8                           | Hepatocellular carcinoma  |
| 25      | 61          | M   | 0.7                           | Hepatocellular carcinoma  |
| 26      | 84          | M   | 1.0                           | Hepatocellular carcinoma  |

344

345 **Table S3. Liver *Bacteroidetes* independently correlates with hepatic immune cell**  
 346 **volume\*.**

| Variable                       | Parameter estimate | Standard error | 95% CI           | t      | P value |
|--------------------------------|--------------------|----------------|------------------|--------|---------|
| Intercept                      | 17550              | 153030         | -306859 – 341959 | 0.1147 | 0.9101  |
| % <i>Bacteroidetes</i> (Liver) | 1045913            | 443852         | 104990 – 1986836 | 2.356  | 0.0315  |
| % <i>Bacteroidetes</i> (Gut)   | 110709             | 384726         | -704873 – 926291 | 0.2878 | 0.7772  |

347 \*Multiple regression analysis with total hepatic immune cells as outcome variable.

348

349

### Supplemental References

- 350 1. Torres-Hernandez A, Wang W, Nikiforov Y, Tejada K, Torres L, Kalabin A, et al. Targeting SYK signaling in myeloid cells protects against liver fibrosis and  
 351 hepatocarcinogenesis. *Oncogene*. 2019;38(23):4512-26.  
 352  
 353 2. Pushalkar S, Ji X, Li Y, Estilo C, Yegnanarayana R, Singh B, et al. Comparison of  
 354 oral microbiota in tumor and non-tumor tissues of patients with oral  
 355 squamous cell carcinoma. *BMC Microbiol*. 2012;12:144.  
 356 3. Pushalkar S, Li X, Kurago Z, Ramanathapuram LV, Matsumura S, Fleisher KE,  
 357 et al. Oral microbiota and host innate immune response in bisphosphonate-  
 358 related osteonecrosis of the jaw. *Int J Oral Sci*. 2014;6(4):219-26.  
 359 4. Goodrich JK, Di Rienzi SC, Poole AC, Koren O, Walters WA, Caporaso JG, et al.  
 360 Conducting a microbiome study. *Cell*. 2014;158(2):250-62.  
 361 5. Mukherjee S, Huntemann M, Ivanova N, Kyrpides NC, and Pati A. Large-scale  
 362 contamination of microbial isolate genomes by Illumina PhiX control. *Stand*  
 363 *Genomic Sci*. 2015;10:18.  
 364 6. Sinha R, Abnet CC, White O, Knight R, and Huttenhower C. The microbiome  
 365 quality control project: baseline study design and future directions. *Genome*  
 366 *Biol*. 2015;16:276.  
 367 7. Caporaso JG, Lauber CL, Walters WA, Berg-Lyons D, Huntley J, Fierer N, et al.  
 368 Ultra-high-throughput microbial community analysis on the Illumina HiSeq  
 369 and MiSeq platforms. *ISME J*. 2012;6(8):1621-4.  
 370 8. Navas-Molina JA, Peralta-Sanchez JM, Gonzalez A, McMurdie PJ, Vazquez-  
 371 Baeza Y, Xu Z, et al. Advancing our understanding of the human microbiome  
 372 using QIIME. *Methods Enzymol*. 2013;531:371-444.  
 373 9. Brown J, Pirrung M, and McCue LA. FQC Dashboard: integrates FastQC results  
 374 into a web-based, interactive, and extensible FASTQ quality control tool.  
 375 *Bioinformatics*. 2017.  
 376 10. Kechin A, Boyarskikh U, Kel A, and Filipenko M. cutPrimers: A New Tool for  
 377 Accurate Cutting of Primers from Reads of Targeted Next Generation  
 378 Sequencing. *J Comput Biol*. 2017;24(11):1138-43.

- 379 11. Caporaso JG, Kuczynski J, Stombaugh J, Bittinger K, Bushman FD, Costello EK,  
380 et al. QIIME allows analysis of high-throughput community sequencing data.  
381 *Nat Methods*. 2010;7(5):335-6.
- 382 12. Edgar RC. Search and clustering orders of magnitude faster than BLAST.  
383 *Bioinformatics*. 2010;26(19):2460-1.
- 384 13. Price MN, Dehal PS, and Arkin AP. FastTree: computing large minimum  
385 evolution trees with profiles instead of a distance matrix. *Mol Biol Evol*.  
386 2009;26(7):1641-50.
- 387 14. McMurdie PJ, and Holmes S. phyloseq: an R package for reproducible  
388 interactive analysis and graphics of microbiome census data. *PLoS One*.  
389 2013;8(4):e61217.
- 390 15. Segata N, Izard J, Waldron L, Gevers D, Miropolsky L, Garrett WS, et al.  
391 Metagenomic biomarker discovery and explanation. *Genome Biol*.  
392 2011;12(6):R60.
- 393 16. Langille MG, Zaneveld J, Caporaso JG, McDonald D, Knights D, Reyes JA, et al.  
394 Predictive functional profiling of microbial communities using 16S rRNA  
395 marker gene sequences. *Nat Biotechnol*. 2013;31(9):814-21.
- 396 17. Douglas GM, Beiko RG, and Langille MGI. Predicting the Functional Potential  
397 of the Microbiome from Marker Genes Using PICRUSt. *Methods Mol Biol*.  
398 2018;1849:169-77.  
399
